# Supplementary material for: Mobile Electronic Medical Records Promote Workflow: Physicians’ Perspective From a Survey
Source: PubMed Central journal article supplement (PMC4914779; doi:10.2196/mhealth.5464), 2016-06-06
Supplement: mhealth_v4i2e70_app1.pdf [file mhealth_v4i2e70_app1.pdf]

## A. Demographic information

Please tick the appropriate box.

1. Sex

female       male

2. Age group

< 30 years       30 - 39 years       40 - 49 years       50 - 59 years       > 59 years

3. Occupational group

Head physician       Resident       Nurse

4. How many times per week were you involved in the clinical routine during the study period?

< 2x times       < 4x times       > 4x times

5. How would you describe your attitude towards novel technologies?

positive       negative

## B. Questions regarding efficiency of the mobile EMR.

**B1: Overall efficiency of the mobile information system.**

| Using a tablet-PC made...                   | Much faster | Somewhat faster | Neutral | Slower | Much slower |
|---------------------------------------------|-------------|-----------------|---------|--------|-------------|
| ...access to patient data...                |             |                 |         |        |             |
| ...the <b>preparation</b> of ward rounds... |             |                 |         |        |             |

|                                                 |  |  |  |  |  |
|-------------------------------------------------|--|--|--|--|--|
|                                                 |  |  |  |  |  |
| ...the <b>conduction</b> of ward rounds...      |  |  |  |  |  |
| ...the <b>post-processing</b> of ward rounds... |  |  |  |  |  |
| ...the entire clinical routine...               |  |  |  |  |  |

**B2. Efficiency of specific sub-processes in the context of data retrieval with the mobile EMR.**

| Using a tablet-PC made access to the following data faster/slower: | Much slower | Slower | Neutral | Faster | Much faster |
|--------------------------------------------------------------------|-------------|--------|---------|--------|-------------|
| <b>1. Patient data</b>                                             |             |        |         |        |             |
| Contact details                                                    |             |        |         |        |             |
| Room numbers                                                       |             |        |         |        |             |
| Length of stay                                                     |             |        |         |        |             |
| Insurance status                                                   |             |        |         |        |             |
| <b>2. Medical evidence</b>                                         |             |        |         |        |             |
| Diagnosis                                                          |             |        |         |        |             |
| Medical history                                                    |             |        |         |        |             |
| Clinical Evidence                                                  |             |        |         |        |             |
| Lab Results                                                        |             |        |         |        |             |
| External Lab Results                                               |             |        |         |        |             |
| Neurological function diagnostic                                   |             |        |         |        |             |
| Non-neurological function diagnostic                               |             |        |         |        |             |
| Microbiology test results                                          |             |        |         |        |             |
| Emergency referral forms                                           |             |        |         |        |             |
| <b>3. Imaging Data</b>                                             |             |        |         |        |             |
| X-ray                                                              |             |        |         |        |             |
| MRI                                                                |             |        |         |        |             |
| CT                                                                 |             |        |         |        |             |
| External images                                                    |             |        |         |        |             |
| <b>4. Other</b>                                                    |             |        |         |        |             |
| Patient care                                                       |             |        |         |        |             |
| Handover between physicians                                        |             |        |         |        |             |
| Home medication                                                    |             |        |         |        |             |

|                 |  |  |  |  |  |
|-----------------|--|--|--|--|--|
| Clinical course |  |  |  |  |  |
|-----------------|--|--|--|--|--|

**B3. Mobile EMR + goldstandard (Paper chart + trolley laptop) vs. exclusive use of goldstandard**

Please provide perceived changes of labour time due to tablet use in minutes.

| Using a tablet-PC changed the amount of time required to... | Time gain per day (in minutes) | Time los per day (in minutes) |
|-------------------------------------------------------------|--------------------------------|-------------------------------|
| ...carry out ward rounds.                                   | +                              | -                             |
| ...prepare ward rounds.                                     | +                              | -                             |
| ...post-process ward rounds.                                | +                              | -                             |
| ...retrieve patient data during ward rounds.                | +                              | -                             |

**B4. What is your favourite documentation tool during ward rounds? You can opt for up to three answers.**

Paper chart

Trolley with laptop

Tablet-PC

**B5. Are there any further aspects in the context of tablet efficiency that you would like to comment on?**

**C. Questions regarding satisfaction with the mobile EMR (Quality)**

**C1. Questions regarding overall satisfaction with the mobile EMR.**

|                            |             |        |               |       |            |
|----------------------------|-------------|--------|---------------|-------|------------|
| By using the mobile EMR... | Much better | Better | Unchange<br>d | worse | Much worse |
|----------------------------|-------------|--------|---------------|-------|------------|

|                                                                                |  |  |  |  |  |
|--------------------------------------------------------------------------------|--|--|--|--|--|
|                                                                                |  |  |  |  |  |
| ...the process of conducting ward rounds worked...                             |  |  |  |  |  |
| ...clinical documentation worked...                                            |  |  |  |  |  |
| ...the currentness of clinical evidence was...                                 |  |  |  |  |  |
| ...generating clinical course documentation was...                             |  |  |  |  |  |
| ...discussing clinical evidence with colleagues / the head physician worked... |  |  |  |  |  |
| ...discussing clinical evidence with patients worked...                        |  |  |  |  |  |
| ...generating clinical orders worked...                                        |  |  |  |  |  |

**C2. Questions regarding location independent access of data as provided by the mobile EMR.**

|                                                                                       | Strongly disagree | Disagree | Neither agree nor disagree | Agree | Strongly agree |
|---------------------------------------------------------------------------------------|-------------------|----------|----------------------------|-------|----------------|
| I perceived mobile real-time access to patient data generally as enriching .          |                   |          |                            |       |                |
| Mobile access to image data improved patient-doctor communication during ward rounds. |                   |          |                            |       |                |
| I perceived mobile access to the red list as enriching.                               |                   |          |                            |       |                |

**C3. Quality of the mobile EMR with respect to image data.**

| How satisfied were you with presentation of data as listed below? | Very unsatisfied | Somewhat unsatisfied | undecided | Somewhat satisfied | Very satisfied |
|-------------------------------------------------------------------|------------------|----------------------|-----------|--------------------|----------------|
| Radiological evidence                                             |                  |                      |           |                    |                |
| External radiological evidence                                    |                  |                      |           |                    |                |
| X-rays                                                            |                  |                      |           |                    |                |

|                                         |  |  |  |  |  |
|-----------------------------------------|--|--|--|--|--|
|                                         |  |  |  |  |  |
| MRT-images                              |  |  |  |  |  |
| CT-images                               |  |  |  |  |  |
| Clinical evidence other than image data |  |  |  |  |  |

**C4. General questions regarding satisfaction with the mobile EMR.**

|                                                                                                                       | Very much | Somewhat | Undecided | Not really | Not at all |
|-----------------------------------------------------------------------------------------------------------------------|-----------|----------|-----------|------------|------------|
| Have your experiences with the tablet-PC increased your motivation to use a tablet during ward rounds in the future?  |           |          |           |            |            |
| Did patients respond generally positive towards tablet use during ward rounds?                                        |           |          |           |            |            |
| Did you perceive the tablet-PC as an useful extension of the current goldstandard (Paper chart + trolley with laptop) |           |          |           |            |            |
| Were you overall satisfied with the tablet-PC as information system during ward rounds?                               |           |          |           |            |            |
